# Supplementary material for: Suppression of lithium dendrite growth by introducing a low reduction potential complex cation in the electrolyte
Source: Royal Society of Chemistry journal article supplement (doi:10.1039/c6ra09480e), 2016-01-01
Supplement: c6ra09480e1.pdf [file c6ra09480e1.pdf]

## Supplementary information

### **Suppression of lithium dendrite growth by introducing a low reduction potential complex cation in electrolyte**

Borong Wu<sup>a,b</sup>, Qi Liu<sup>a</sup>, Daobin Mu<sup>a\*</sup>, Hongliang Xu<sup>a</sup>, Lei Wang<sup>a</sup>, Lili Shi<sup>a</sup>, Liang Gai<sup>a</sup>, Feng Wu<sup>a,b</sup>

*a. Beijing Key Laboratory of Environment Science and Engineering, School of Material Science and Engineering, Beijing Institute of Technology, Beijing 100081, China*

*b. Collaborative Innovation Center of Electric Vehicles in Beijing, Beijing, 100081, China*

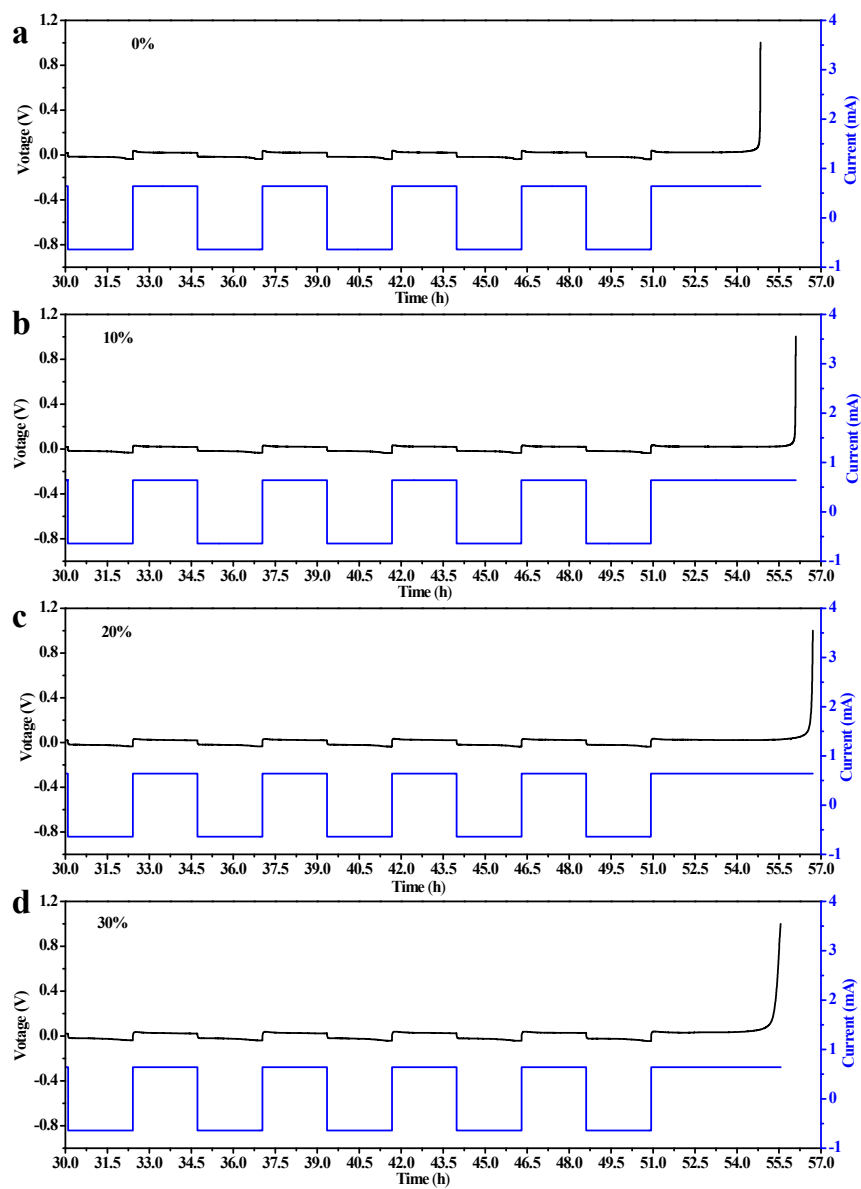

**Fig.S1** The curves of current-time and voltage-time during the lithium deposition and stripping on Cu substrate.

Cycling performance of LiCoO<sub>2</sub> composite using electrolyte with 20% content of the complex cation donor at a current rate of 0.2C and within the 2–4.2 V range, it delivers a reversible capacity of 134mAh/g after 50 cycles (See Figure S2), indicating that no evident influence occurs for the cathode cyclic performance when the LPRCC is introduced to electrolyte.

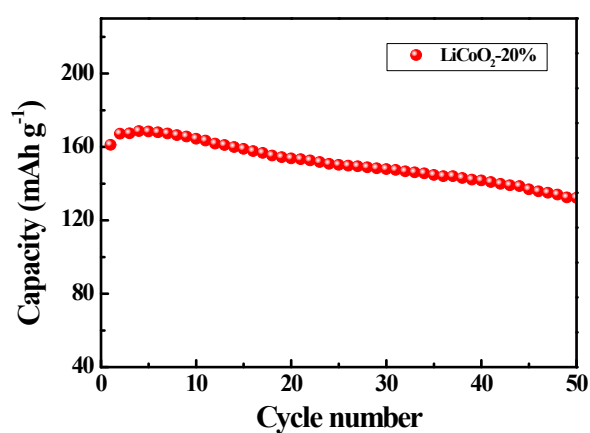

**Fig.S2** Cycling performance of LiCoO<sub>2</sub> composite using electrolyte with 20% content of the complex cation donor at a current rate of 0.2C.
